# Supplementary material for: Differential DNA Methylation in Relation to Age and Health Risks of Obesity
Source: MDPI journal article supplement (doi:10.3390/ijms160816816), 2015-07-24
Supplement: s1 [file s1]

## Supplementary Information

**Table S3.** Estimated Regression Coefficients for age and HRO in pooled population.

| <b>Age</b>               | <b>Est</b> | <b>SE0</b> | <b>SE1</b> | <b>SE2</b> | <b>Zscore</b> | <b>p-Values</b> |
|--------------------------|------------|------------|------------|------------|---------------|-----------------|
| (Intercept, $\gamma_0$ ) | -0.01231   | 0.02858    | 0.02823    | 0.02886    | -0.4263       | 0.669865        |
| T Cell (CD8+)            | 0.43564    | 0.13114    | 0.14679    | 0.14703    | 2.963         | 0.003047        |
| T Cell (CD4+)            | -0.42751   | 0.13095    | 0.1217     | 0.13988    | -3.0562       | 0.002242        |
| NK Cell                  | -0.07706   | 0.03764    | 0.0416     | 0.04161    | -1.8518       | 0.064055        |
| B Cell                   | -0.07617   | 0.02172    | 0.03224    | 0.0324     | -2.3511       | 0.018719        |
| Monocyte                 | -0.03749   | 0.03753    | 0.04363    | 0.04556    | -0.8228       | 0.410599        |
| Granulocyte              | 0.23294    | 0.0373     | 0.11958    | 0.11932    | 1.9521        | 0.050921        |
| <b>HRO</b>               | <b>Est</b> | <b>SE0</b> | <b>SE1</b> | <b>SE2</b> | <b>Zscore</b> | <b>p-Values</b> |
| (Intercept, $\gamma_0$ ) | -0.2735    | 0.8333     | 0.6222     | 0.6208     | -0.4406       | 0.6595          |
| T Cell (CD8+)            | 0.1167     | 3.8234     | 3.3733     | 3.086      | 0.0378        | 0.9698          |
| T Cell (CD4+)            | -2.120     | 3.8181     | 2.568      | 2.9295     | -0.7236       | 0.4693          |
| NK Cell                  | -0.3187    | 1.0975     | 0.9321     | 0.937      | -0.3401       | 0.7338          |
| B Cell                   | 0.1743     | 0.6333     | 0.6583     | 0.6704     | 0.2600        | 0.7948          |
| Monocyte                 | -0.6448    | 1.0943     | 0.9498     | 0.9738     | -0.6622       | 0.5079          |
| Granulocyte              | 2.6731     | 1.0874     | 2.5669     | 2.5735     | 1.0387        | 0.2989          |

Est = Regression coefficient estimate ( $\times 100\%$ ); SE0 = Naive standard error ( $\times 100\%$ ); SE1 = Single-bootstrap standard error ( $\times 100\%$ ); SE2 = Double-bootstrap standard error ( $\times 100\%$ ); Zscore = Statistical measurement of a score's relationship to the mean in a group of scores ( $\times 100\%$ ); NK = Natural killer; *p*-values were computed using SE2.
